# Supplementary material
Source: MDPI journal article supplement (https://www.mdpi.com/2073-4441/10/2/194)
Supplement: s1 [file s1]

**Table S1.** Water permeability classes based on soil and geological characteristics of the drainage basin and the predominant structure type.

| Permeability class | Ground features                                                    | Geological or hydrolithological characteristics                                                                                                                                            | Structure features                                                |
|--------------------|--------------------------------------------------------------------|--------------------------------------------------------------------------------------------------------------------------------------------------------------------------------------------|-------------------------------------------------------------------|
| Very High          | Very light and well drained soils                                  | Strongly karstified carbonate formations, extensive development e.g. fractured limestones, dolomites, marbles                                                                              |                                                                   |
| High               | Sandy and gravelly soils, with a small percentage of silt and clay | Fluvial deposits, inconsistent conglomerates, breccia triadic                                                                                                                              | Very small settlements                                            |
| Moderate           | Thick sandy soils, silts and silty soils, sandy clay               | Granular alluvial deposits, schists, cohesive conglomerates, platy or fine grained limestone alternating with schist formations                                                            | Sparsely built areas, significant garden development, urban parks |
| Low                | Fine clay soils, soils from clay, soils poor in organic material   | Flysch, metamorphic, plutonic and volcanic rocks, granular non-alluvial deposits (alternating sands, marls, clays, conglomerates, marly limestones, sandstones), granular molasse deposits | Moderately built areas with lawns and small gardens               |
| Very Low           | Shallow soils that swell when wetted, plastic clays                | Compact rock of negligible permeability (granites)                                                                                                                                         | Shopping centers, densely built areas                             |

**Table S2.** Vegetation classes based on land use/cover characteristics

| Vegetation class | Land use/cover characteristics                                                  |
|------------------|---------------------------------------------------------------------------------|
| Dense            | Forests (conifers, broadleaf)                                                   |
| Moderate         | Transitional forests, orchards, olive groves, riparian vegetation               |
| Low              | Pastures, crops, vineyards, grassland, scrub                                    |
| Sparse           | Fallow land, non-irrigated arable land, dunes, wetlands, scattered construction |
| Zero             | Bare or rocky soil, artificial surfaces (roads, buildings)                      |

**Table S3.** Drainage capacity classes based on the average slope and related ground features

| <b>Drainage capacity class</b> | <b>Average slope*</b> | <b>Other features</b>                                                                              |
|--------------------------------|-----------------------|----------------------------------------------------------------------------------------------------|
| Negligible                     | 0 %                   | Inadequate drainage system, frequent and extensive bedsores, unformatted hydrographic network      |
| Low                            | 1-2 %                 | Significant surface degradation, occasional bedsores, poorly shaped river network                  |
| Moderate                       | 2-10 %                | Small surface degradation, rare flooding, shallow, small drainage corridors                        |
| High                           | 10-30 %               | Negligible soil degradations, very well shaped hydrographic network, existence of drainage network |
| Very High                      | 30 %                  | Mountainous terrain                                                                                |

\* Rounded to the nearest integer, which means that the first class corresponds to slopes <0.5 %, the second to gradients between 0.5 to 2.5 % and so on.
